# Supplementary material
Source: PubMed Central journal article supplement (PMC4495322)

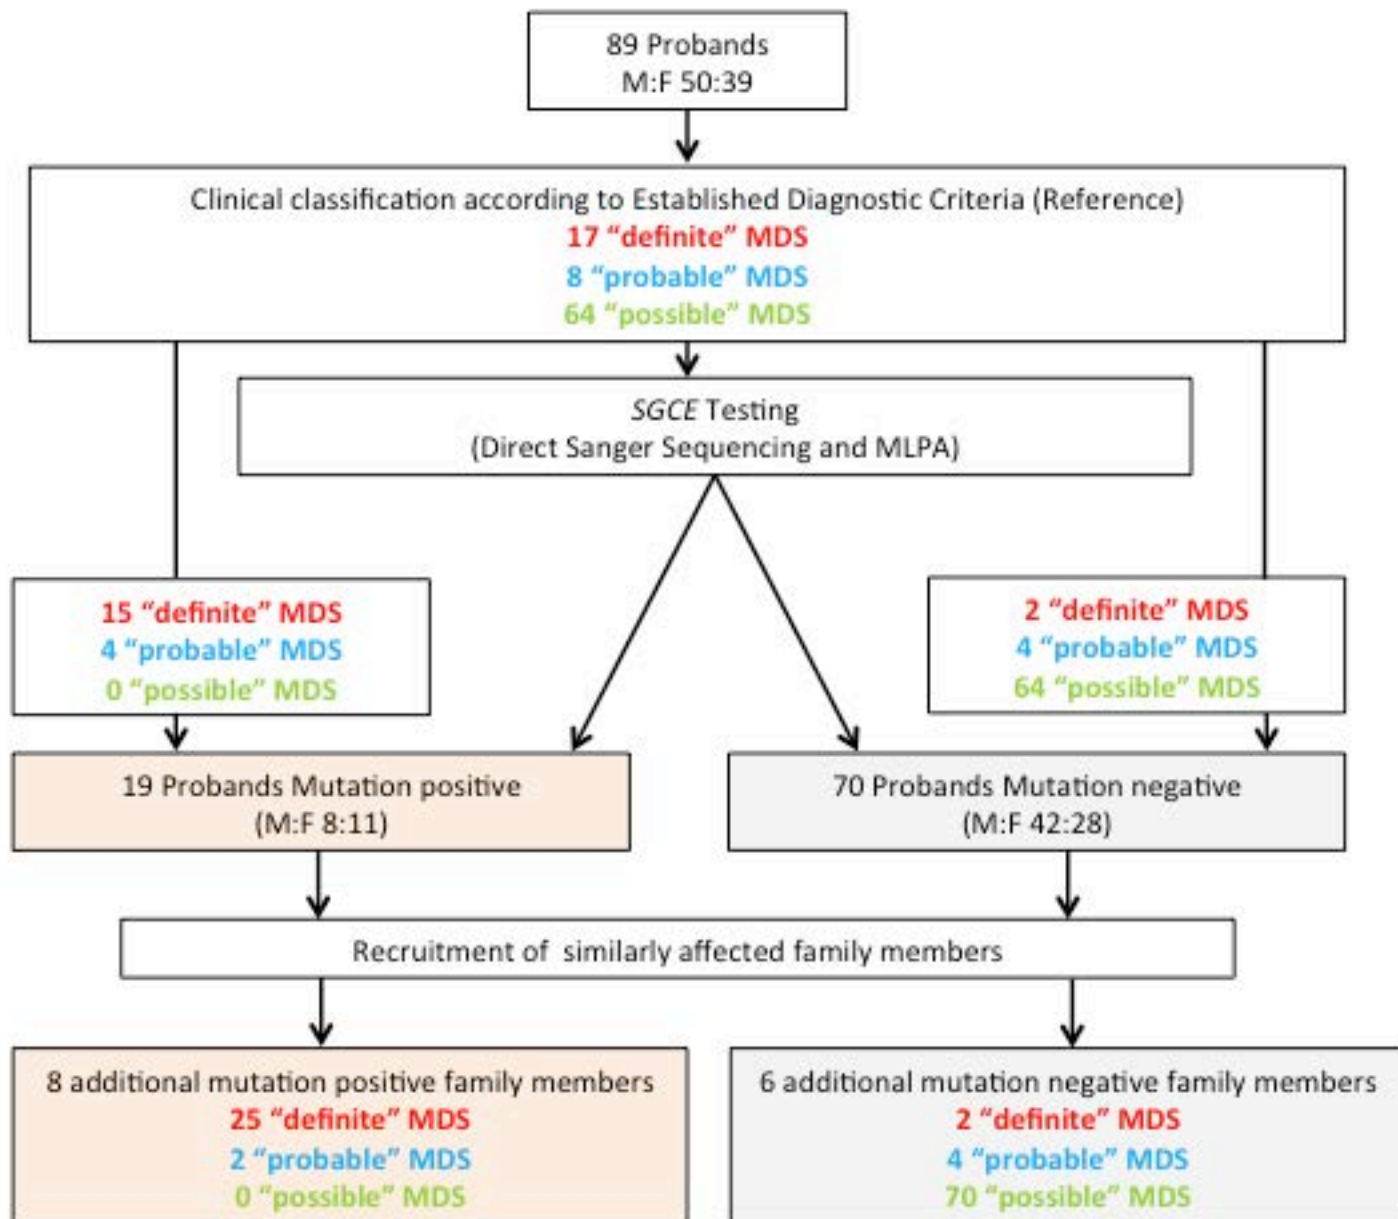

Supplement: NIHMS63996-supplement-Figure.pdf [file NIHMS63996-supplement-Figure.pdf]
